# Supplementary material
Source: publisher figshare collection journal article supplement (https://acs.figshare.com/ndownloader/files/3758098)
Supplement: Supplementary file 1 [file 3758098]

# Supporting Information

## **Systematic investigations on the roles of the electron acceptor and neighboring ethynylene moiety in porphyrins for dye sensitized solar cells**

*Tiantian Wei†, Xi Sun†, Xin Li\*‡, Hans Ågren‡ and Yongshu Xie\*†*

† Key Laboratory for Advanced Materials and Institute of Fine Chemicals, East China University of Science & Technology, Shanghai 200237 (P. R. China), E-mail: yshxie@ecust.edu.cn

‡ Division of Theoretical Chemistry and Biology, School of Biotechnology, KTH Royal Institute of Technology, SE-10691 Stockholm, Sweden, E-mail: lixin@theochem.kth.se; agren@theochem.kth.se

# Characterization data for the compounds

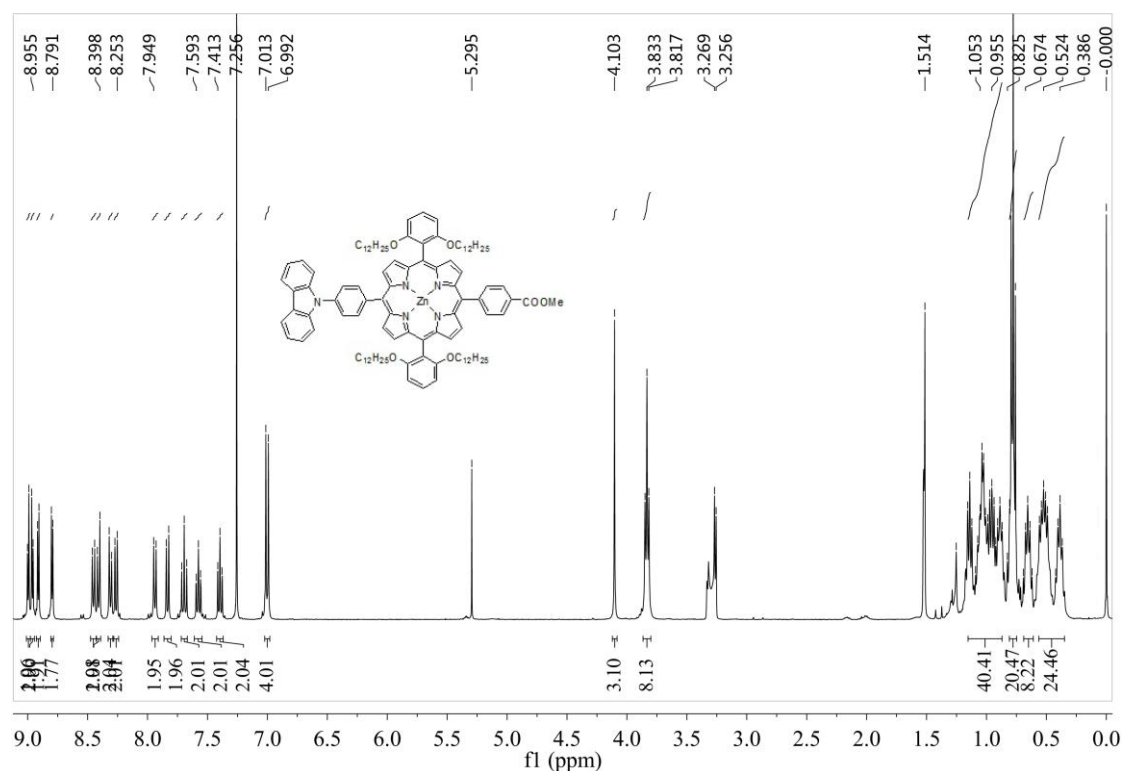

**Figure S1.** The <sup>1</sup>H NMR spectrum of 1s in CDCl<sub>3</sub>

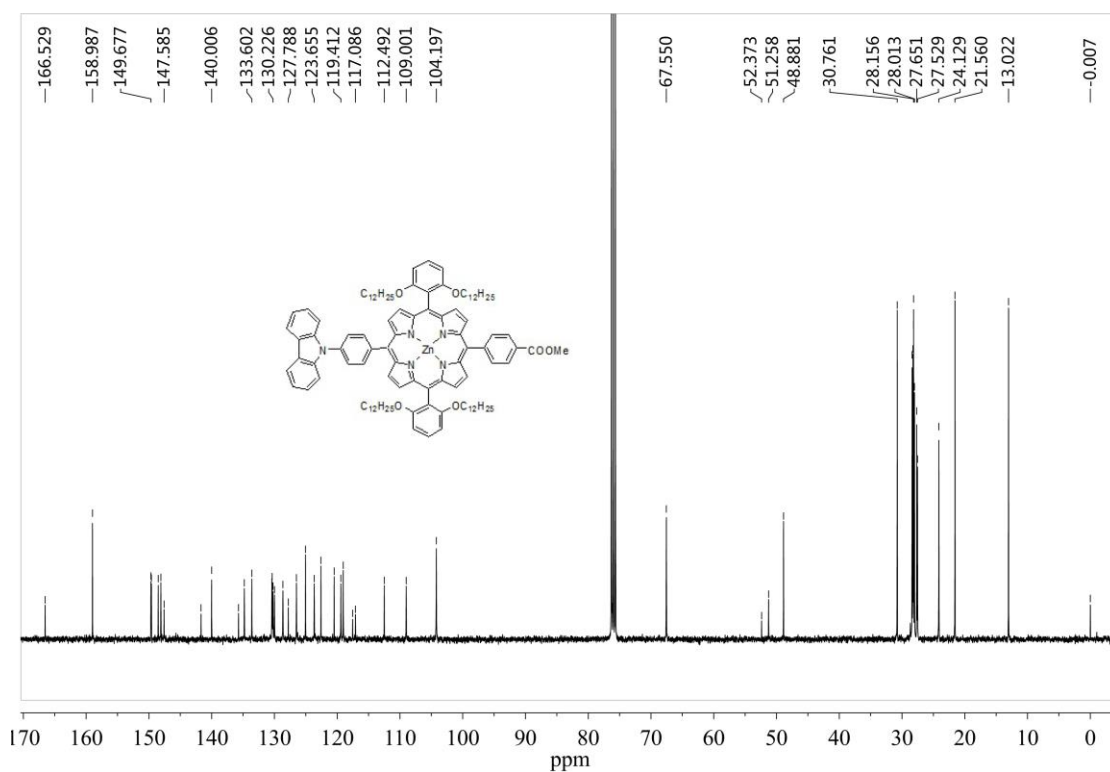

**Figure S2.** The <sup>13</sup>C NMR spectrum of 1s in CDCl<sub>3</sub>

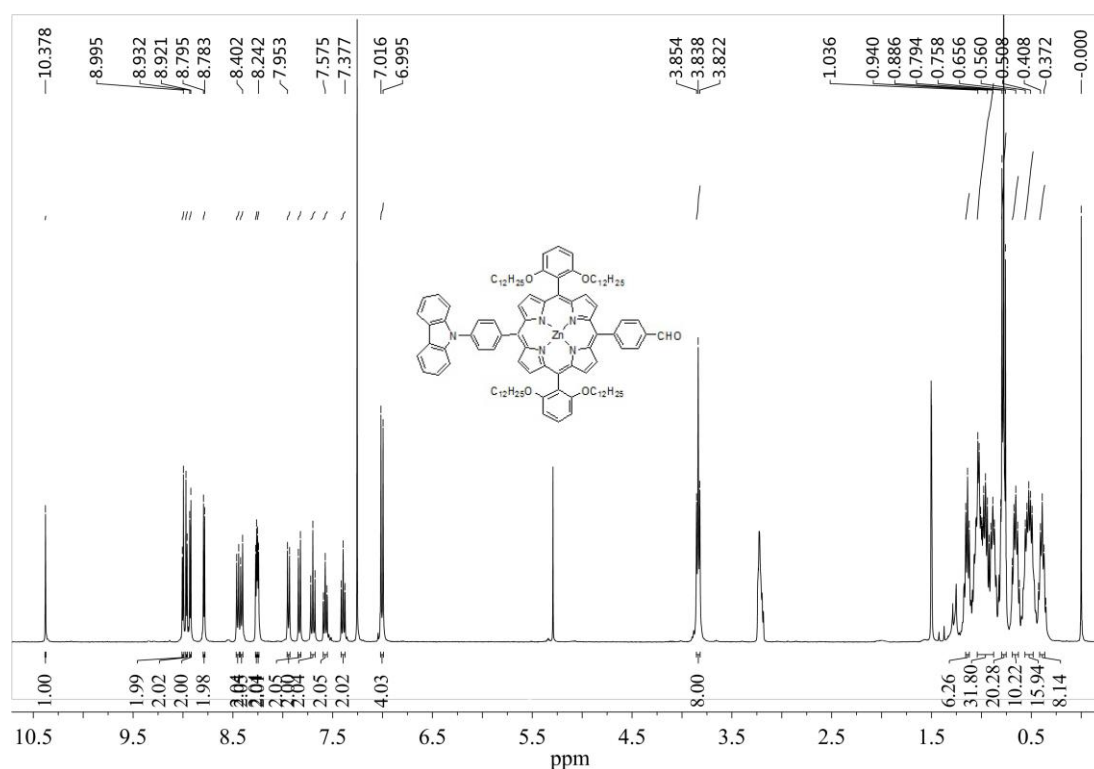

**Figure S3.** The  $^1\text{H}$  NMR spectrum of **2s** in  $\text{CDCl}_3$

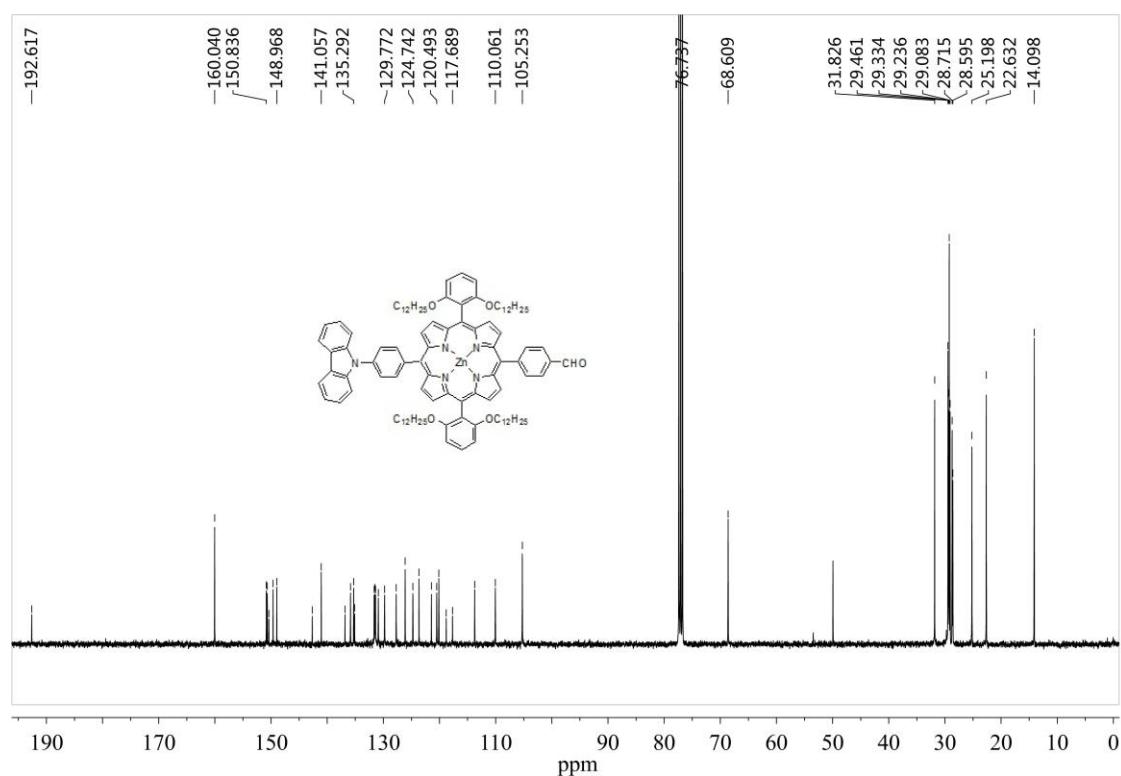

**Figure S4.** The  $^{13}\text{C}$  NMR spectrum of **2s** in  $\text{CDCl}_3$

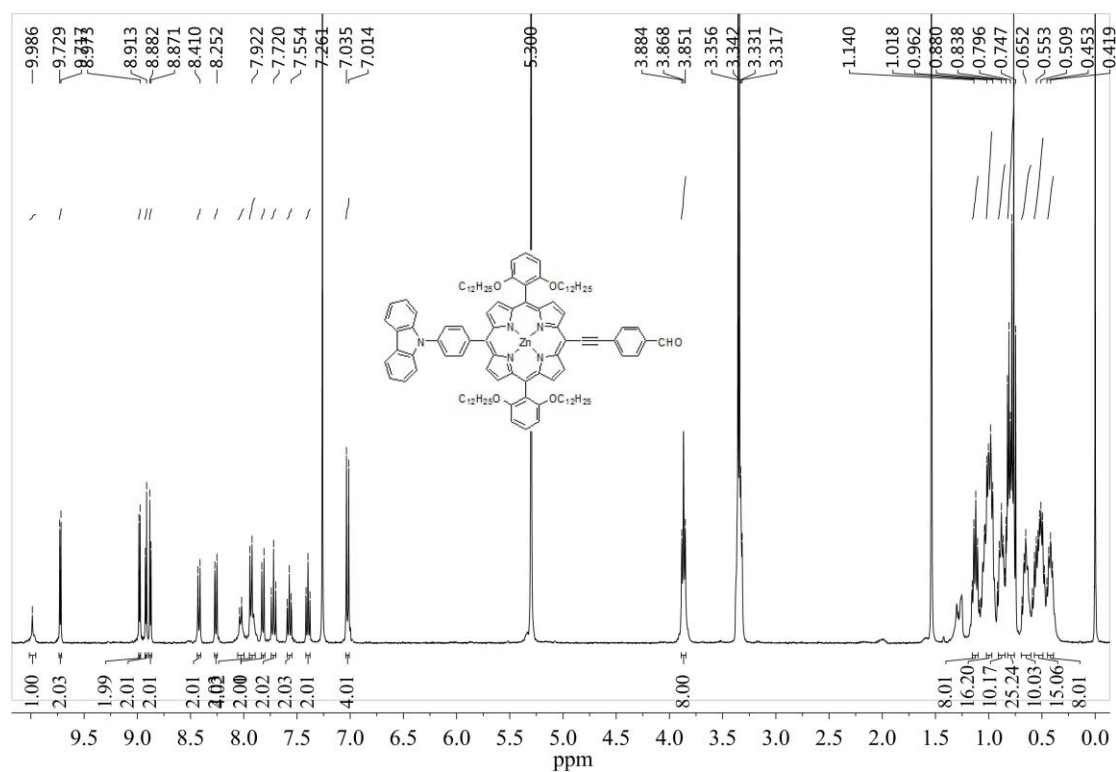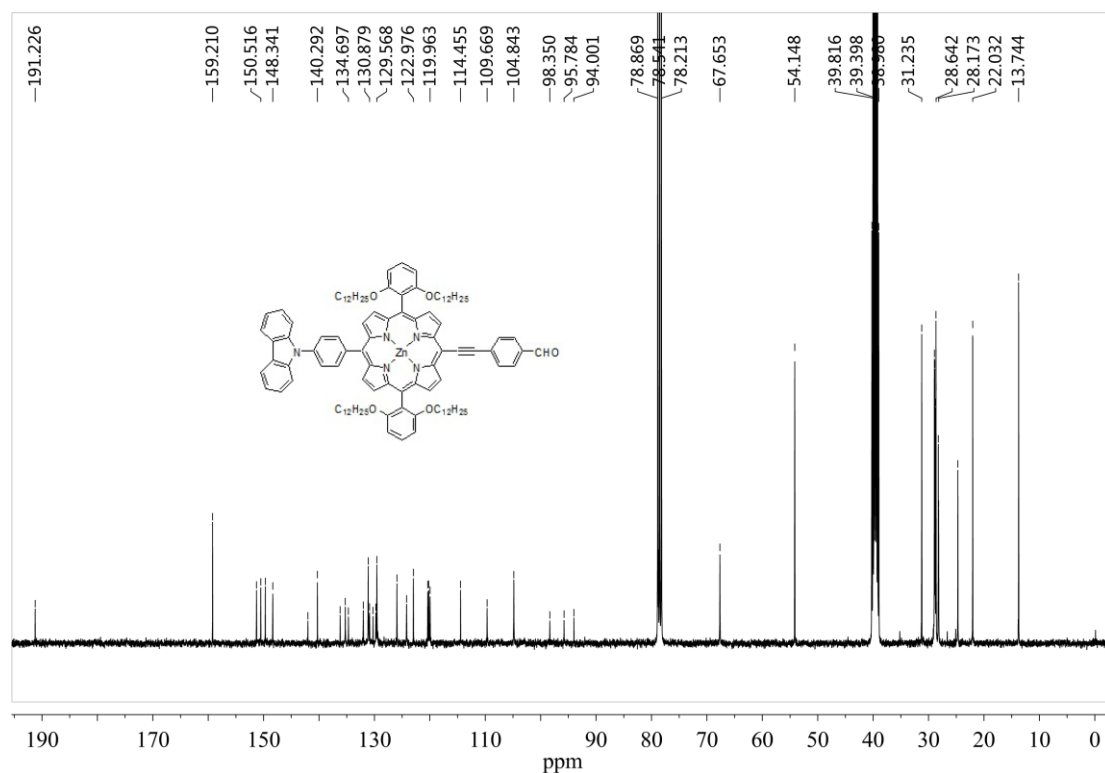

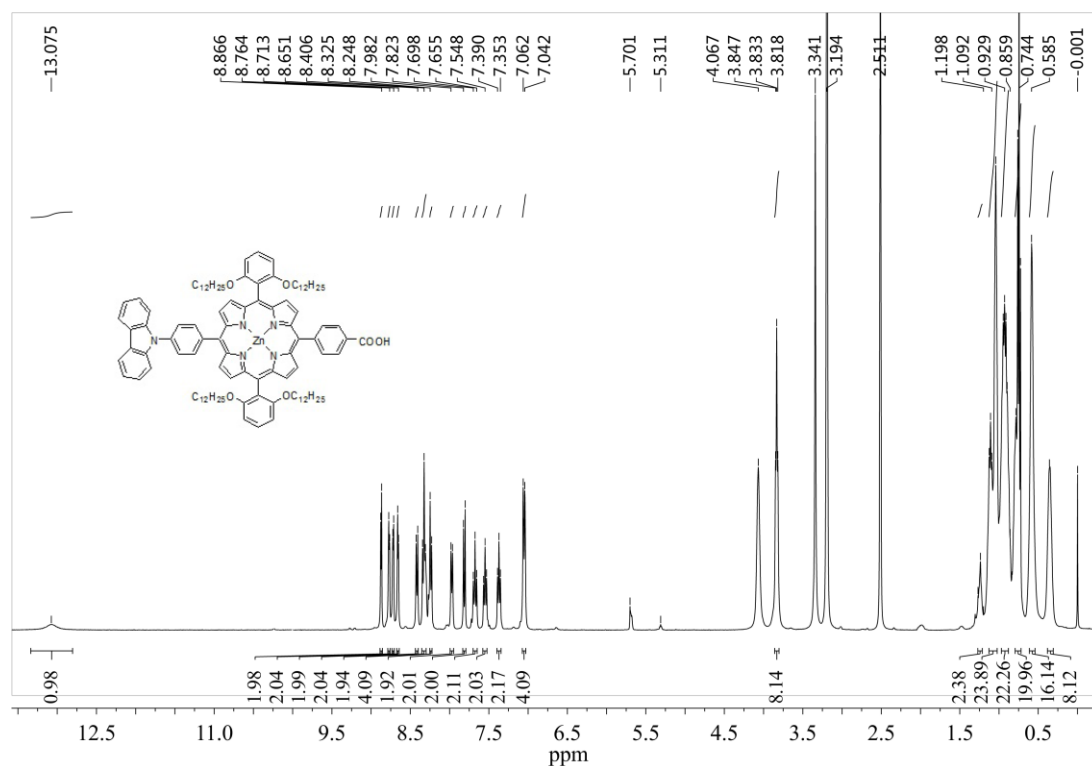

**Figure S7.** The <sup>1</sup>H NMR spectrum of **XW5** in CDCl<sub>3</sub>:DMSO-*d*<sub>6</sub> (1 : 3)

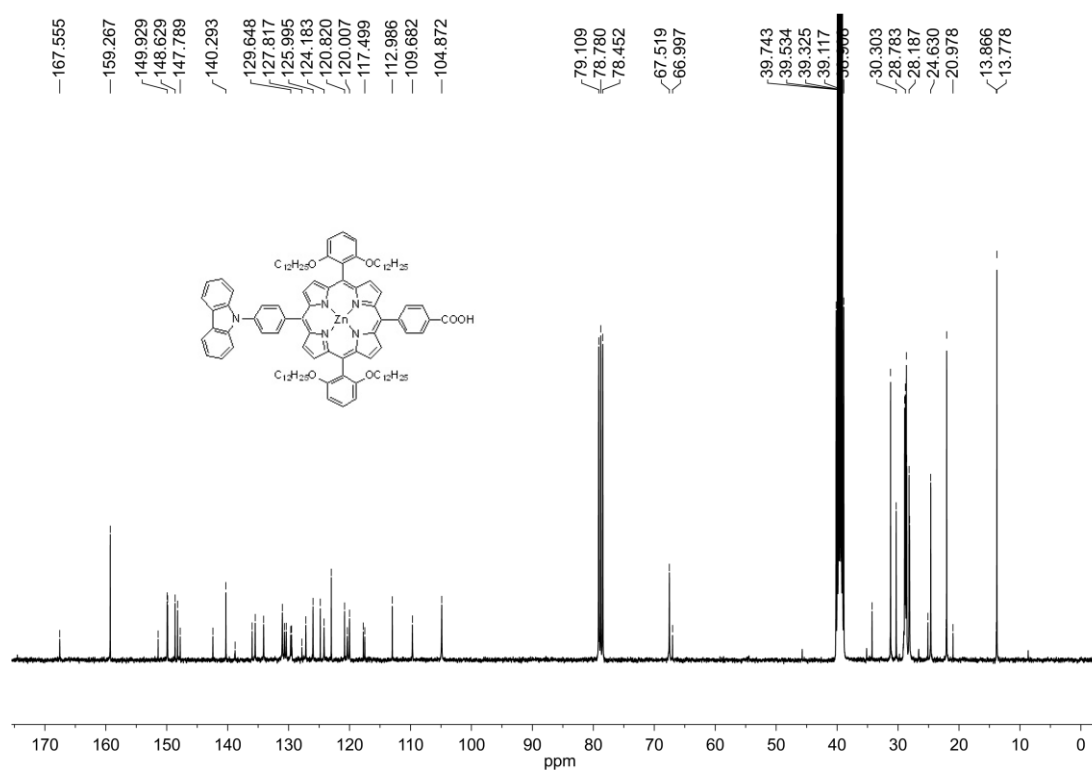

**Figure S8.** The <sup>13</sup>C NMR spectrum of **XW5** in CDCl<sub>3</sub>:DMSO-*d*<sub>6</sub> (1 : 3)

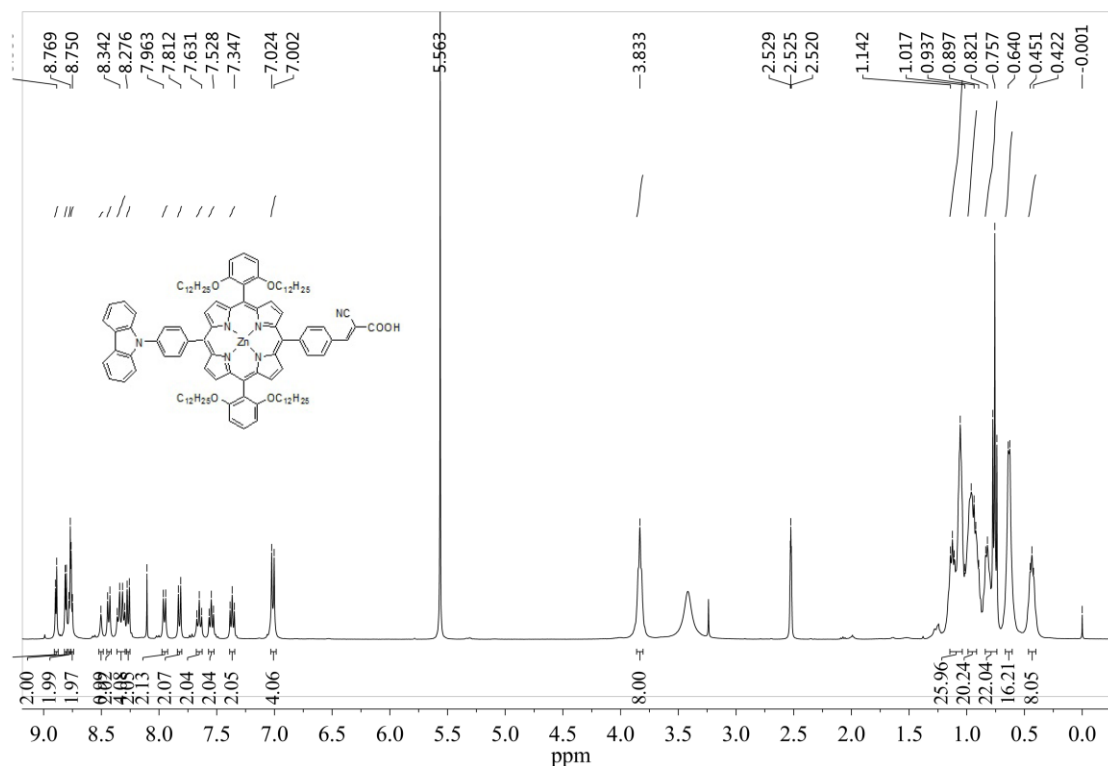

**Figure S9.** The  $^1\text{H}$  NMR spectrum of **XW6** in  $\text{CDCl}_3$ : $\text{DMSO}-d_6$  (1 : 3)

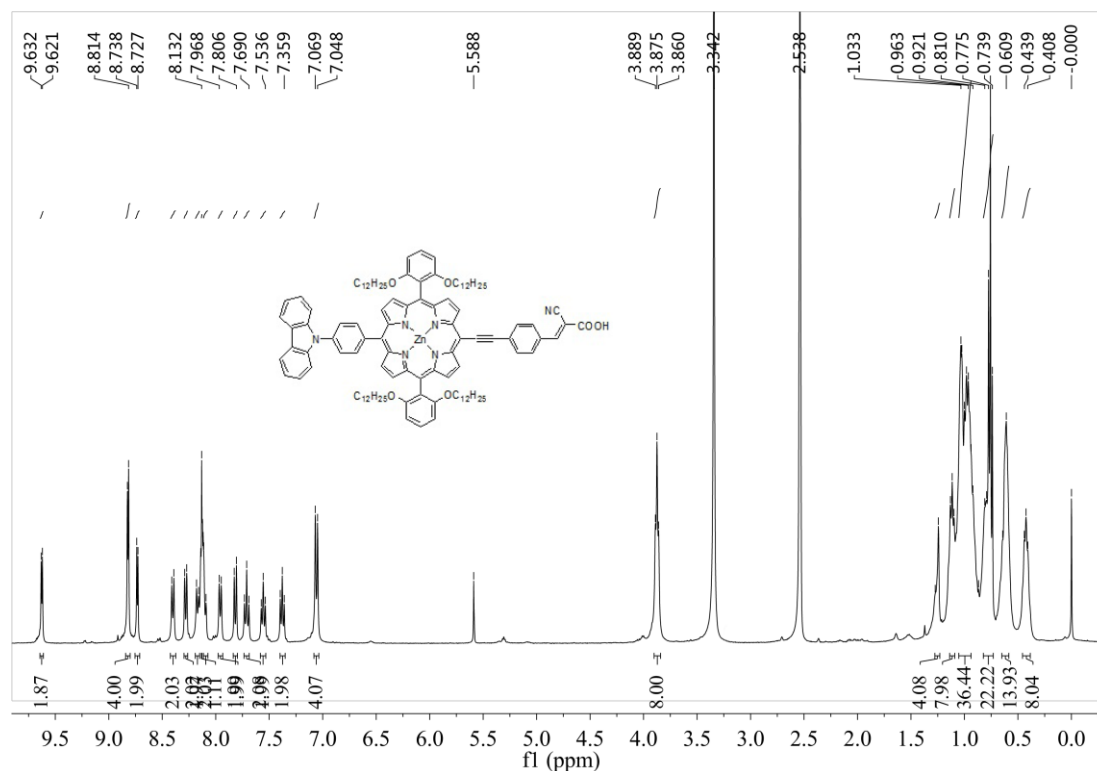

**Figure S10.** The  $^1\text{H}$  NMR spectrum of **XW7** in  $\text{CDCl}_3$  :  $\text{DMSO}-d_6$  (1 : 3)



**Table S1.** Calculated excitation energies, wavelengths, oscillator strengths and molecular orbital compositions for the lowest excited states.

| Compound   | Excited state  | Excitation energy | Oscillator strength | MO composition                                  |
|------------|----------------|-------------------|---------------------|-------------------------------------------------|
| <b>XW1</b> | S <sub>1</sub> | 2.11 eV, 587 nm   | 0.306               | H-0→L+0 (71%)<br>H-1→L+1 (26%)                  |
| <b>XW5</b> | S <sub>1</sub> | 2.22 eV, 557 nm   | 0.031               | H-0→L+0 (57%)<br>H-1→L+1 (41%)                  |
| <b>XW6</b> | S <sub>1</sub> | 2.15 eV, 577 nm   | 0.167               | H-0→L+0 (63%)<br>H-1→L+1 (24%)<br>H-0→L+2 (11%) |
| <b>XW7</b> | S <sub>1</sub> | 2.02 eV, 613 nm   | 0.767               | H-0→L+0 (78%)<br>H-1→L+1 (15%)                  |
| <b>XW8</b> | S <sub>1</sub> | 2.10 eV, 591 nm   | 0.382               | H-0→L+0 (73%)<br>H-1→L+1 (24%)                  |

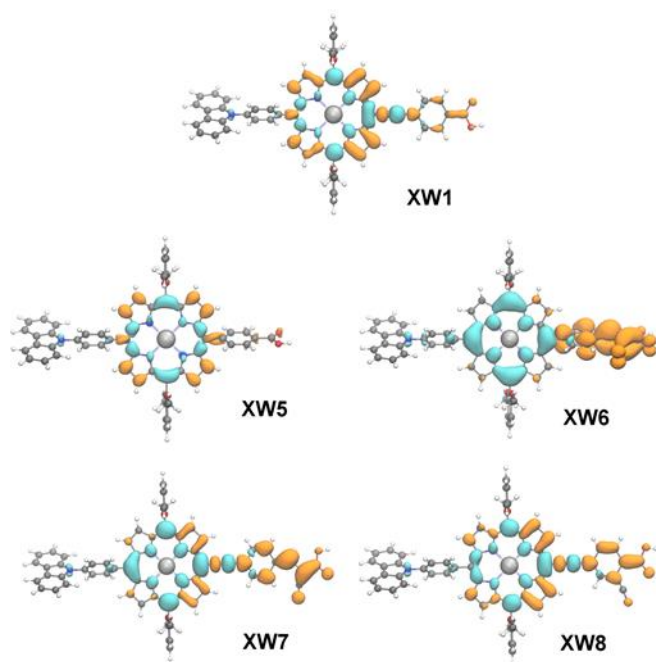

**Figure S13.** Electron density difference contours for the lowest excited states of the sensitizer dyes. Electron detachment and attachment are shown in cyan and orange color, respectively.



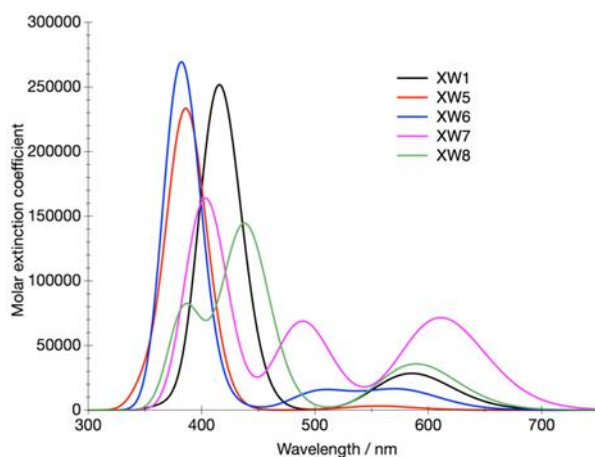

**Figure S14.** Simulated absorption spectra.

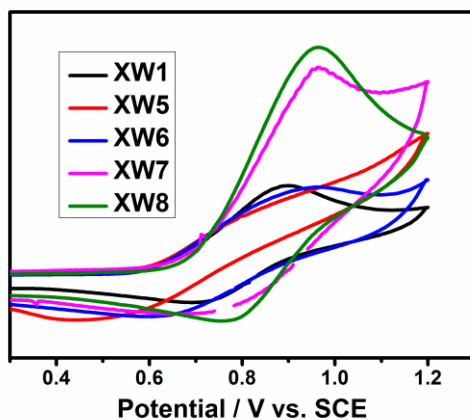

**Figure S15.** The cyclic voltammetry curves of the dyes adsorbed to a nanocrystalline  $\text{TiO}_2$  film deposited on conducting FTO glass.

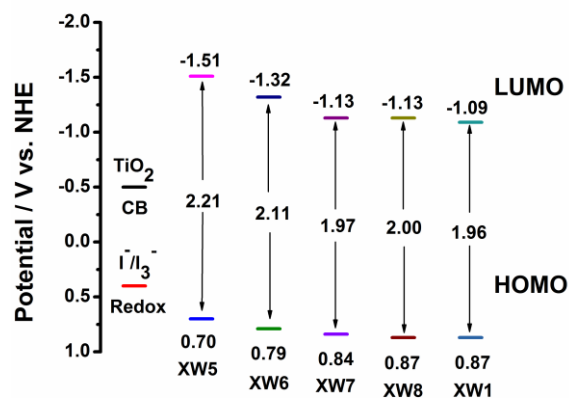

**Figure S16.** Schematic energy-level diagram of XW5–XW8 and XW1.

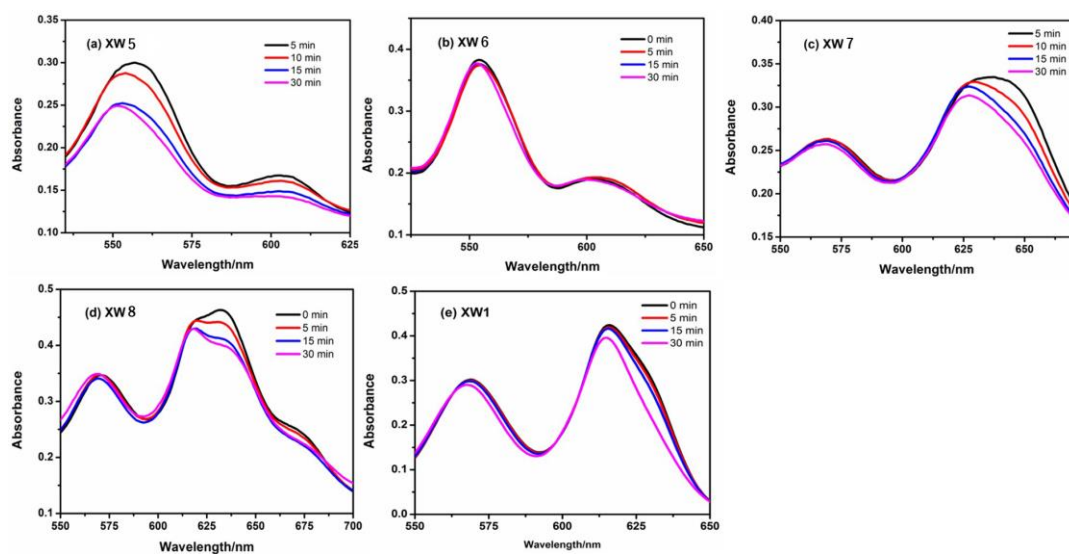

**Figure S17.** Absorption spectra of (a) XW5, (b) XW6, (c) XW7, (d) XW8 and (e) XW1 adsorbed onto TiO<sub>2</sub> films after irradiation for 0, 5, 15 and 30 min.

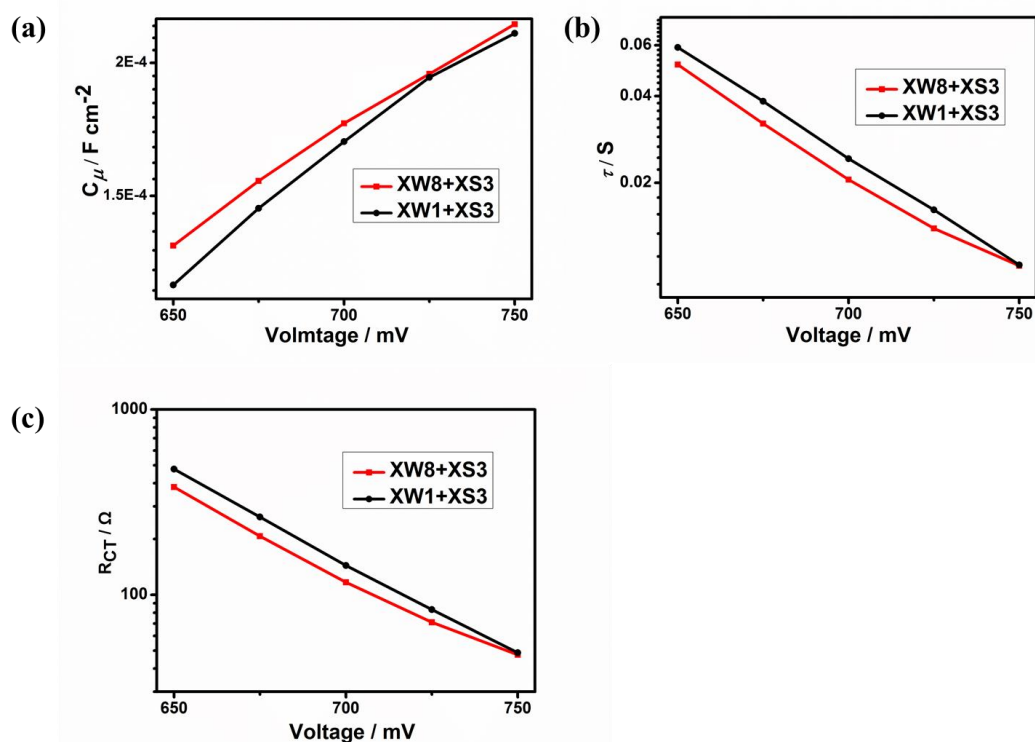

**Figure S18.** Chemical capacitance  $C_{\mu}$  (a), electron lifetime  $\tau$  (b), and interfacial charge transfer resistance  $R_{CT}$  (c) of the co-sensitized DSSC.
